# Supplementary material for: The 6th Meeting of the Global Alliance to Eliminate Lymphatic Filariasis: A half-time review of lymphatic filariasis elimination and its integration with the control of other neglected tropical diseases
Source: Springer Nature journal article supplement (doi:10.1186/1756-3305-3-100), 2010-01-01

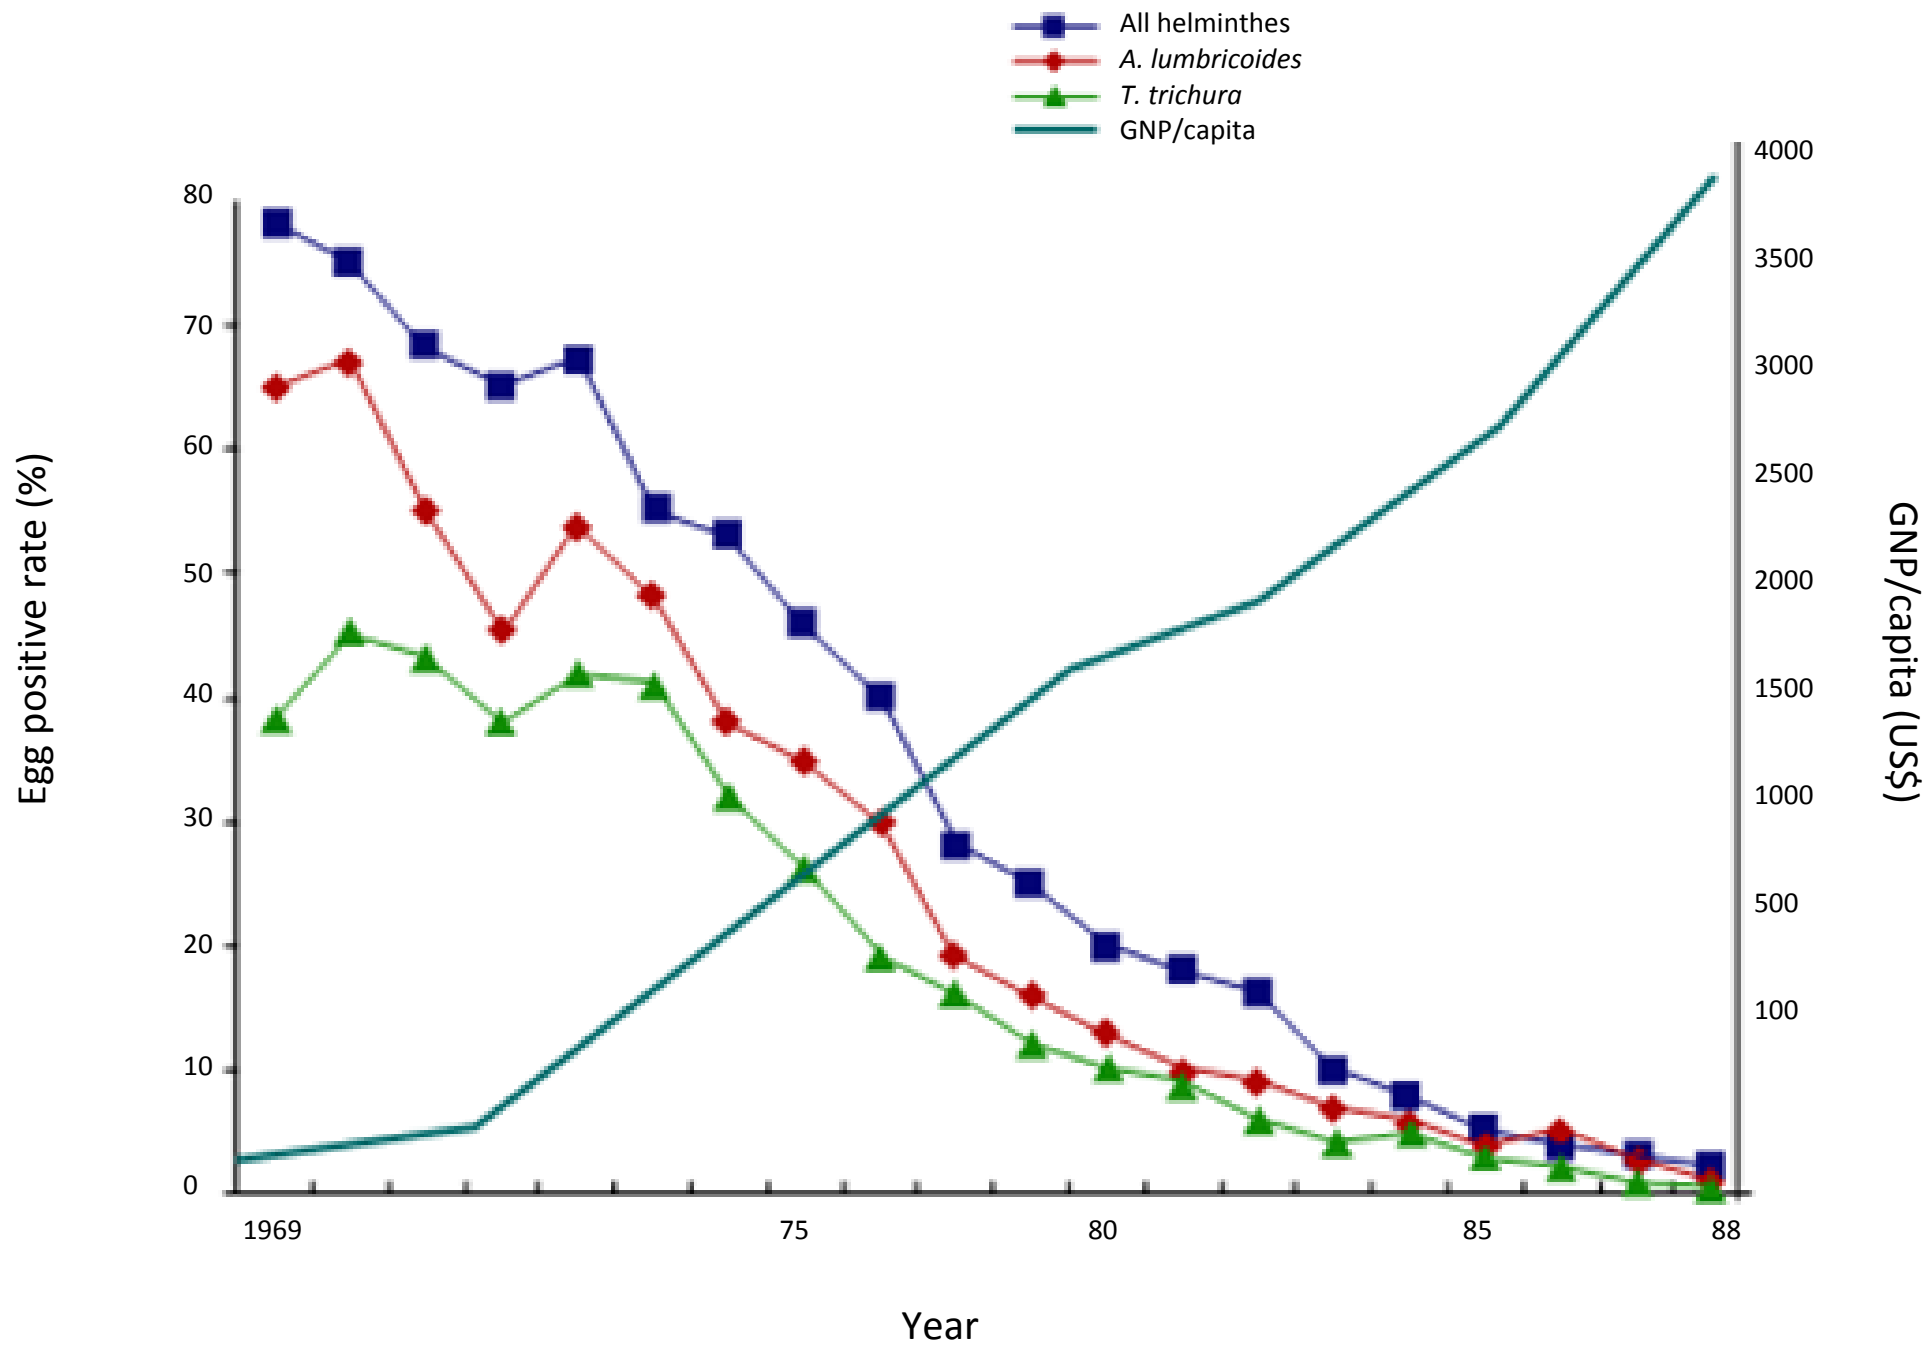

Supplement: 13071_2010_228_MOESM2_ESM.pdf [file 13071_2010_228_MOESM2_ESM.pdf]
