# Supplementary material for: The 6th Meeting of the Global Alliance to Eliminate Lymphatic Filariasis: A half-time review of lymphatic filariasis elimination and its integration with the control of other neglected tropical diseases
Source: Springer Nature journal article supplement (doi:10.1186/1756-3305-3-100), 2010-01-01
Supplement: 13071_2010_228_MOESM3_ESM.pdf [file 13071_2010_228_MOESM3_ESM.pdf]

# MDA status of LF endemic countries

| WHO Region/<br>PRG | LF endemic countries | Estimated population at risk (2009) | Countries under MDA (2009) | Countries unlikely to require MDA | Countries completed ≥5 rounds nationwide or partially (end of 2009) | Targeted population by MDA (end of 2009) | Cumulative number of treatments (2000-2009) |
|--------------------|----------------------|-------------------------------------|----------------------------|-----------------------------------|---------------------------------------------------------------------|------------------------------------------|---------------------------------------------|
| <b>AFR</b>         | 39                   | 408,429,756                         | 18                         | 5                                 | 10                                                                  | 104,963,306                              | 273,952,117                                 |
| <b>AMR</b>         | 7                    | 11,349,793                          | 4                          | 3                                 | 3                                                                   | 5,922,193                                | 12,532,495                                  |
| <b>EMR</b>         | 3                    | 12,565,325                          | 2                          |                                   | 2                                                                   | 565,325                                  | 14,125,270                                  |
| <b>SEAR</b>        | 9                    | 873,264,167                         | 9                          |                                   | 7                                                                   | 695,216,694                              | 2,328,231,443                               |
| <b>MEK</b>         | 6                    | 32,115,887                          | 5                          | 1                                 | 4                                                                   | 25,890,680                               | 95,478,249                                  |
| <b>PAC</b>         | 17                   | 5,813,842                           | 14                         | 1                                 | 11                                                                  | 2,991,746                                | 8,575,528                                   |
| <b>Global</b>      | <b>81</b>            | <b>1,343,538,770</b>                | <b>52</b>                  | <b>10</b>                         | <b>37</b>                                                           | <b>835,549,944</b>                       | <b>2,732,895,102</b>                        |
