# Supplementary material for: The 6th Meeting of the Global Alliance to Eliminate Lymphatic Filariasis: A half-time review of lymphatic filariasis elimination and its integration with the control of other neglected tropical diseases
Source: Springer Nature journal article supplement (doi:10.1186/1756-3305-3-100), 2010-01-01
Supplement: 13071_2010_228_MOESM4_ESM.pdf [file 13071_2010_228_MOESM4_ESM.pdf]

# Disease Prevention & Economic Savings

Estimated Health and Economic Impact of GPELF (2000-2008)

| <b>Health Impact</b>                               | <b>Individuals Protected</b> | <b>Economic Cost</b>     |
|----------------------------------------------------|------------------------------|--------------------------|
| Prevention of infection in newborns                | 8.7 million babies           | \$2.3 billion            |
| Prevention of progression from subclinical disease | 10.7 million babies          | \$16.5 billion           |
| Prevention of worsening of morbidity or reversal   | 2.6 million people           | \$5.4 billion            |
| <b>Total</b>                                       | 22 million people protected  | \$24.2 billion prevented |
