# Supplementary material for: The 6th Meeting of the Global Alliance to Eliminate Lymphatic Filariasis: A half-time review of lymphatic filariasis elimination and its integration with the control of other neglected tropical diseases
Source: Springer Nature journal article supplement (doi:10.1186/1756-3305-3-100), 2010-01-01
Supplement: 13071_2010_228_MOESM6_ESM.pdf [file 13071_2010_228_MOESM6_ESM.pdf]

| Year | Milestones                                                                                                                                                                                                                                                                                                                                                                                                                                            |
|------|-------------------------------------------------------------------------------------------------------------------------------------------------------------------------------------------------------------------------------------------------------------------------------------------------------------------------------------------------------------------------------------------------------------------------------------------------------|
| 2011 | <ul style="list-style-type: none"> <li>• Revised WHO guidelines for stopping MDA and post-MDA surveillance completed and available</li> <li>• WHO guidelines and criteria for verification of the interruption of LF transmission completed and available</li> <li>• WHO guidelines and training modules for morbidity management completed and available</li> </ul>                                                                                  |
| 2012 | <ul style="list-style-type: none"> <li>• LF mapping completed in all countries</li> <li>• MDA started in all countries without co-endemic loiasis</li> <li>• Provisional strategy for LF transmission interruption in loiasis-endemic countries developed and circulated</li> <li>• 25% of endemic countries will have met the criteria for stopping MDA and entered post-intervention surveillance</li> </ul>                                        |
| 2013 | <ul style="list-style-type: none"> <li>• Revised strategy for LF transmission interruption implemented in all loiasis-endemic countries</li> <li>• Metrics for annual reporting on morbidity management programmes developed by WHO and disseminated</li> </ul>                                                                                                                                                                                       |
| 2014 | <ul style="list-style-type: none"> <li>• 20% of endemic countries verified free of LF transmission</li> <li>• All GPELF countries collect and report data on morbidity management to WHO</li> </ul>                                                                                                                                                                                                                                                   |
| 2015 | <ul style="list-style-type: none"> <li>• Full geographic coverage with MDA and/or other interventions in all LF-endemic urban areas</li> <li>• Full geographic coverage with MDA and/or other interventions in all countries not endemic for loiasis</li> <li>• Morbidity management plans and policies part of all national LF elimination programmes</li> <li>• Mid-plan assessment of progress, global impact, and remaining challenges</li> </ul> |
| 2016 | <ul style="list-style-type: none"> <li>• Full geographic coverage with MDA and/or other interventions to interrupt transmission in heaviest burden countries</li> <li>• Full geographic coverage with MDA and/or other interventions in all countries with co-endemic loiasis</li> <li>• 70% of endemic countries will have met the criteria for stopping MDA and entered post-intervention surveillance</li> </ul>                                   |
| 2020 | <ul style="list-style-type: none"> <li>• All countries either verified as free of LF (70%) or under post-MDA surveillance (30%)</li> <li>• Full geographic coverage and access to basic care for lymphoedema (and hydrocele in areas of bancroftian filariasis) in all countries</li> </ul>                                                                                                                                                           |
